# Supplementary material
Source: MDPI journal article supplement (https://www.mdpi.com/2071-1050/14/9/5715)
Supplement: s1 [file s1]

## Supplementary Materials File S1

### Links between Socio-Demographic Variables and Adaptation Responses

**Table S1. Links between household income and farmers' adaptation responses**

| Adaptation strategies        | Income groups    | Respondents (frequency) |     | Respondents (%) |      | $\chi^2$ value                          |
|------------------------------|------------------|-------------------------|-----|-----------------|------|-----------------------------------------|
|                              |                  | No                      | Yes | No              | Yes  |                                         |
| Adjusted crop planting dates | 500 - 5,000      | 3                       | 83  | 3.5             | 96.5 | $\chi^2 = 10.671$ , df = 4, $P = 0.05$  |
|                              | 6,000 -10,000    | 2                       | 137 | 1.4             | 98.6 |                                         |
|                              | 11,000 - 25,000  | 3                       | 83  | 3.5             | 96.5 |                                         |
|                              | 26, 000 - 40,000 | 0                       | 52  | 0               | 100  |                                         |
|                              | 40,000 +         | 4                       | 33  | 10.8            | 89.2 |                                         |
| Changes in crop types        | 500 - 5,000      | 36                      | 50  | 41.9            | 58.1 | $\chi^2 = 0.446$ , df = 4, $P = 0.979$  |
|                              | 6,000 -10,000    | 55                      | 84  | 39.6            | 60.4 |                                         |
|                              | 11,000 - 25,000  | 32                      | 54  | 37.2            | 62.8 |                                         |
|                              | 26, 000 - 40,000 | 20                      | 32  | 38.5            | 61.5 |                                         |
|                              | 40,000 +         | 14                      | 23  | 37.8            | 62.2 |                                         |
| Diversified crops            | 500 - 5,000      | 60                      | 26  | 69.8            | 30.2 | $\chi^2 = 13.974$ , df = 4, $P = 0.007$ |
|                              | 6,000 -10,000    | 90                      | 49  | 64.7            | 35.3 |                                         |
|                              | 11,000 - 25,000  | 43                      | 43  | 50              | 50   |                                         |
|                              | 26, 000 - 40,000 | 26                      | 26  | 50              | 50   |                                         |
|                              | 40,000 +         | 28                      | 9   | 75.7            | 24.3 |                                         |
| Adopted improved seeds       | 500 - 5,000      | 58                      | 28  | 67.4            | 32.6 | $\chi^2 = 2.44$ , df = 4, $P = 0.655$   |
|                              | 6,000 -10,000    | 90                      | 49  | 64.7            | 35.3 |                                         |
|                              | 11,000 - 25,000  | 55                      | 31  | 64              | 36   |                                         |
|                              | 26, 000 - 40,000 | 33                      | 19  | 59.6            | 40.4 |                                         |
|                              | 40,000 +         | 20                      | 17  | 54.1            | 45.9 |                                         |
| Adopted irrigation           | 500 - 5,000      | 73                      | 13  | 84.9            | 15.1 | $\chi^2 = 7.03$ , df = 4, $P = 0.13$    |
|                              | 6,000 -10,000    | 112                     | 27  | 80.6            | 19.4 |                                         |
|                              | 11,000 - 25,000  | 70                      | 16  | 81.4            | 18.6 |                                         |
|                              | 26, 000 - 40,000 | 36                      | 16  | 69.2            | 30.8 |                                         |
|                              | 40,000 +         | 26                      | 11  | 70.3            | 29.7 |                                         |
| Temporary migration          | 500 - 5,000      | 31                      | 55  | 36              | 64   | $\chi^2 = 0.743$ , df = 4, $P = 0.946$  |
|                              | 6,000 -10,000    | 50                      | 89  | 36              | 64   |                                         |
|                              | 11,000 - 25,000  | 27                      | 59  | 31.4            | 68.6 |                                         |
|                              | 26, 000 - 40,000 | 19                      | 33  | 36.5            | 63.5 |                                         |
|                              | 40,000 +         | 12                      | 25  | 32.4            | 67.6 |                                         |
| Other non-farm/off-farm      | 500 - 5,000      | 56                      | 30  | 65.1            | 34.9 | $\chi^2 = 1.429$ , df = 4, $P = 0.828$  |
|                              | 6,000 -10,000    | 80                      | 59  | 57.6            | 42.4 |                                         |
|                              | 11,000 - 25,000  | 53                      | 33  | 61.6            | 38.4 |                                         |
|                              | 26, 000 - 40,000 | 30                      | 22  | 57.7            | 42.3 |                                         |
|                              | 40,000 +         | 22                      | 15  | 61.6            | 38.4 |                                         |

**Table S2. Links between gender and farmers' adaptation responses**

| Adaptation strategies   | Gender | Respondents (frequency) |     | Respondents (%) |      | $\chi^2$ value                         |
|-------------------------|--------|-------------------------|-----|-----------------|------|----------------------------------------|
|                         |        | No                      | Yes | No              | Yes  |                                        |
| Adjusted planting dates | Female | 3                       | 118 | 2.5             | 97.5 | $\chi^2 = 0.162$ , df = 1, $P = 0.88$  |
|                         | Male   | 9                       | 270 | 3.2             | 96.8 |                                        |
| Changes in crop types   | Female | 50                      | 71  | 41.3            | 58.7 | $\chi^2 = 0.312$ , df = 1, $P = 0.576$ |
|                         | Male   | 107                     | 172 | 38.4            | 61.6 |                                        |
| Diversified crops       | Female | 86                      | 35  | 71.1            | 28.9 | $\chi^2 = 6.386$ , df = 1, $P = 0.01$  |
|                         | Male   | 161                     | 118 | 57.7            | 42.3 |                                        |
| Adopted improved seeds  | Female | 87                      | 34  | 71.9            | 28.9 | $\chi^2 = 5.282$ , df = 1, $P = 0.022$ |
|                         | Male   | 167                     | 112 | 59.9            | 40.1 |                                        |
| Adopted irrigation      | Female | 104                     | 17  | 86              | 14   | $\chi^2 = 4.736$ , df = 1, $P = 0.03$  |
|                         | Male   | 213                     | 66  | 76.3            | 23.7 |                                        |
| Temporary migration     | Female | 41                      | 80  | 33.9            | 66   | $\chi^2 = 0.057$ , df = 1, $P = 0.8$   |
|                         | Male   | 98                      | 181 | 35.1            | 64.9 |                                        |
| Other non-farm/off-farm | Female | 71                      | 50  | 58.7            | 41.3 | $\chi^2 = 0.179$ , df = 1, $P = 0.67$  |
|                         | Male   | 170                     | 109 | 60.9            | 39.1 |                                        |

**Table S3. Links between age and farmers' adaptation responses**

| Adaptation strategies   | Age groups | Respondents (frequency) |     | Respondents (%) |      | $\chi^2$ value                         |
|-------------------------|------------|-------------------------|-----|-----------------|------|----------------------------------------|
|                         |            | No                      | Yes | No              | Yes  |                                        |
| Adjusted planting dates | 18-25      | 0                       | 21  | 0               | 100  | $\chi^2 = 4.720$ , df = 5, $P = 0.64$  |
|                         | 26-35      | 1                       | 85  | 1.2             | 98.8 |                                        |
|                         | 36-45      | 7                       | 156 | 4.3             | 95.7 |                                        |
|                         | 46-55      | 3                       | 73  | 3.9             | 96.1 |                                        |
|                         | 56-65      | 1                       | 35  | 2.8             | 97.2 |                                        |
|                         | 65+        | 0                       | 18  | 0               | 100  |                                        |
| Changes in crop types   | 18-25      | 10                      | 11  | 47.6            | 52.4 | $\chi^2 = 7.082$ , df = 5, $P = 0.25$  |
|                         | 26-35      | 29                      | 57  | 33.7            | 66.3 |                                        |
|                         | 36-45      | 60                      | 103 | 36.8            | 63.2 |                                        |
|                         | 46-55      | 39                      | 37  | 51.3            | 48.7 |                                        |
|                         | 56-65      | 13                      | 23  | 36.1            | 63.9 |                                        |
|                         | 65+        | 6                       | 12  | 33.3            | 66.7 |                                        |
| Diversified crops       | 18-25      | 15                      | 6   | 71.4            | 28.6 | $\chi^2 = 11.669$ , df = 5, $P = 0.04$ |
|                         | 26-35      | 60                      | 26  | 69.8            | 30.2 |                                        |
|                         | 36-45      | 98                      | 65  | 60.1            | 39.9 |                                        |
|                         | 46-55      | 45                      | 31  | 59.2            | 40.8 |                                        |
|                         | 56-65      | 15                      | 21  | 41.7            | 58.3 |                                        |
|                         | 65+        | 14                      | 4   | 77.8            | 22.2 |                                        |
| Adopted improved seeds  | 18-25      | 13                      | 8   | 61.9            | 38.1 | $\chi^2 = 1.239$ , df = 5, $P = 0.94$  |
|                         | 26-35      | 58                      | 28  | 67.4            | 32.6 |                                        |
|                         | 36-45      | 100                     | 63  | 61.3            | 38.7 |                                        |
|                         | 46-55      | 47                      | 29  | 61.8            | 38.2 |                                        |
|                         | 56-65      | 24                      | 12  | 66.7            | 33.3 |                                        |
|                         | 65+        | 12                      | 6   | 66.7            | 33.3 |                                        |
| Adopted irrigation      | 18-25      | 21                      | 0   | 100             | 0    |                                        |

|                         |       |     |     |      |      |                                        |
|-------------------------|-------|-----|-----|------|------|----------------------------------------|
|                         | 26-35 | 72  | 14  | 83.7 | 16.3 | $\chi^2 = 8.6$ , df = 5, $P = 0.126$   |
|                         | 36-45 | 125 | 38  | 76.7 | 23.3 |                                        |
|                         | 46-55 | 57  | 19  | 75   | 25.0 |                                        |
|                         | 56-65 | 27  | 9   | 75   | 25   |                                        |
|                         | 65+   | 15  | 3   | 83.3 | 16.7 |                                        |
| Temporary migration     | 18-25 | 8   | 13  | 38.1 | 61.9 | $\chi^2 = 3.2$ , df = 5, $P = 0.67$    |
|                         | 26-35 | 31  | 55  | 36   | 64   |                                        |
|                         | 36-45 | 49  | 114 | 36   | 64   |                                        |
|                         | 46-55 | 29  | 47  | 38.2 | 61.8 |                                        |
|                         | 56-65 | 14  | 22  | 38.9 | 61.1 |                                        |
|                         | 65+   | 8   | 10  | 44.4 | 55.6 |                                        |
| Other non-farm/off-farm | 18-25 | 12  | 9   | 57.1 | 42.9 | $\chi^2 = 6.995$ , df = 5, $P = 0.221$ |
|                         | 26-35 | 58  | 28  | 67.4 | 32.6 |                                        |
|                         | 36-45 | 92  | 71  | 56.4 | 43.6 |                                        |
|                         | 46-55 | 45  | 31  | 59.2 | 40.8 |                                        |
|                         | 56-65 | 26  | 10  | 72.2 | 27.8 |                                        |
|                         | 65+   | 8   | 10  | 44.4 | 55.6 |                                        |

**Table S4. Links between educational level and farmers' adaptation responses**

| Adaptation strategies   | Educational level     | Respondents (frequency) |     | Respondents (percentages) |      | $\chi^2$ value                         |
|-------------------------|-----------------------|-------------------------|-----|---------------------------|------|----------------------------------------|
| Adjusted planting dates |                       | No                      | Yes | No                        | Yes  | $\chi^2 = 3.751$ , df = 4, $P = 0.725$ |
|                         | Do not read and write | 12                      | 331 | 3.5                       | 96.5 |                                        |
|                         | Read and write        | 0                       | 42  | 0                         | 100  |                                        |
|                         | Primary education     | 0                       | 9   | 0                         | 100  |                                        |
|                         | Secondary education   | 0                       | 4   | 0                         | 100  |                                        |
|                         | Higher education      | 0                       | 2   | 0                         | 100  |                                        |
| Changes in crop types   | Do not read and write | 139                     | 204 | 40.5                      | 59.5 | $\chi^2 = 8.439$ , df = 4, $P = 0.077$ |
|                         | Read and write        | 13                      | 29  | 31                        | 69   |                                        |
|                         | Primary education     | 5                       | 4   | 55.6                      | 44.4 |                                        |
|                         | Secondary education   | 0                       | 4   | 0                         | 100  |                                        |
|                         | Higher education      | 0                       | 2   | 0                         | 100  |                                        |
| Diversified crops       | Do not read and write | 208                     | 135 | 60.6                      | 39.4 | $\chi^2 = 10.040$ , df = 4, $P = 0.04$ |
|                         | Read and write        | 31                      | 11  | 73.8                      | 26.2 |                                        |
|                         | Primary education     | 7                       | 2   | 77.8                      | 22.2 |                                        |
|                         | Secondary education   | 1                       | 3   | 25                        | 75   |                                        |
|                         | Higher education      | 0                       | 2   | 0                         | 100  |                                        |
| Adopted improved seeds  | Do not read and write | 219                     | 124 | 63.8                      | 36.2 | $\chi^2 = 9.040$ , df = 4, $P = 0.06$  |
|                         | Read and write        | 27                      | 15  | 64.3                      | 35.7 |                                        |

|                         |                       |     |     |      |      |                                        |
|-------------------------|-----------------------|-----|-----|------|------|----------------------------------------|
|                         | Primary education     | 4   | 5   | 44.4 | 55.6 |                                        |
|                         | Secondary education   | 4   | 0   | 100  | 0    |                                        |
|                         | Higher education      | 0   | 2   | 0    | 100  |                                        |
| Adopted irrigation      | Do not read and write | 275 | 68  | 80.2 | 19.8 | $\chi^2 = 3.787$ , df = 4, $P = 0.436$ |
|                         | Read and write        | 32  | 10  | 76.2 | 23.8 |                                        |
|                         | Primary education     | 6   | 3   | 66.7 | 33.3 |                                        |
|                         | Secondary education   | 2   | 2   | 50   | 50   |                                        |
|                         | Higher education      | 2   | 0   | 100  | 0    |                                        |
| Temporary migration     | Do not read and write | 115 | 228 | 33.5 | 65.5 | $\chi^2 = 4.913$ , df = 4, $P = 0.296$ |
|                         | Read and write        | 18  | 24  | 42.9 | 52.1 |                                        |
|                         | Primary education     | 5   | 4   | 55.6 | 44.4 |                                        |
|                         | Secondary education   | 1   | 3   | 25   | 75   |                                        |
|                         | Higher education      | 0   | 2   | 0    | 100  |                                        |
| Other non-farm/off-farm | Do not read and write | 203 | 140 | 59.2 | 40.8 | $\chi^2 = 7.5$ , df = 4, $P = 0.259$   |
|                         | Read and write        | 25  | 17  | 59.5 | 40.5 |                                        |
|                         | Primary education     | 7   | 2   | 77.8 | 22.2 |                                        |
|                         | Secondary education   | 4   | 0   | 100  | 0    |                                        |
|                         | Higher education      | 2   | 0   | 100  | 0    |                                        |

**Table S5. Links between crop diversification and Family size**

| Type of adaptation   | Family size<br>(Number of children) | Respondent (frequency) |     | Respondent (%) |       | $\chi^2$ value                        |
|----------------------|-------------------------------------|------------------------|-----|----------------|-------|---------------------------------------|
|                      |                                     | No                     | Yes | No             | Yes   |                                       |
| Crop diversification | 0                                   | 24                     | 6   | 80.0%          | 20.0% | $\chi^2 = 15.8$ , df = 4, $P = 0.003$ |
|                      | 1-2                                 | 45                     | 13  | 77.6%          | 22.4% |                                       |
|                      | 3-4                                 | 71                     | 48  | 59.7%          | 40.3% |                                       |
|                      | 5-11                                | 104                    | 80  | 56.5%          | 43.5% |                                       |
|                      | 8+                                  | 3                      | 6   | 33.3%          | 66.7% |                                       |

**Table S6. Links between adaptation motivation and Education level**

| Adaptation strategy  | Crop diversification motivation                          | Education level       | Respondents (frequency) |     | Respondent (%) |      | $\chi^2$ value                           |
|----------------------|----------------------------------------------------------|-----------------------|-------------------------|-----|----------------|------|------------------------------------------|
|                      |                                                          |                       | No                      | yes | No             | Yes  |                                          |
| Crop diversification | To minimize market risks                                 | Do not read and write | 241                     | 102 | 70.3           | 29.7 | $\chi^2 = 9.330$ , $df = 4$ , $P = 0.05$ |
|                      |                                                          | Read and write        | 32                      | 10  | 76.2           | 23.8 |                                          |
|                      |                                                          | Primary education     | 7                       | 2   | 77.8           | 22.2 |                                          |
|                      |                                                          | Secondary education   | 1                       | 3   | 25             | 75   |                                          |
|                      |                                                          | Higher education      | 0                       | 2   | 0              | 100  |                                          |
|                      | Climate related factor                                   | Do not read and write | 244                     | 99  | 71.1           | 28.9 | $\chi^2 = 5.3$ , $df = 4$ , $P = 0.257$  |
|                      |                                                          | Read and write        | 32                      | 10  | 76.2           | 23.8 |                                          |
|                      |                                                          | Primary education     | 7                       | 2   | 77.8           | 22.2 |                                          |
|                      |                                                          | Secondary education   | 1                       | 3   | 25             | 75   |                                          |
|                      |                                                          | Higher education      | 1                       | 1   | 50             | 50   |                                          |
|                      | To control pests and diseases and improve soil fertility | Do not read and write | 276                     | 67  | 80.5           | 19.5 | $\chi^2 = 12.2$ , $df = 4$ , $P = 0.01$  |
|                      |                                                          | Read and write        | 37                      | 5   | 88.1           | 11.9 |                                          |
|                      |                                                          | Primary education     | 7                       | 2   | 77.8           | 22.2 |                                          |
|                      |                                                          | Secondary education   | 2                       | 2   | 50             | 50   |                                          |
|                      |                                                          | Higher education      | 0                       | 2   | 0              | 100  |                                          |
|                      | To balance food demand                                   | Do not read and write | 277                     | 66  | 80.8           | 19.2 | $\chi^2 = 2.65$ , $df = 4$ , $P = 0.62$  |
|                      |                                                          | Read and write        | 37                      | 5   | 88.1           | 11.9 |                                          |
|                      |                                                          | Primary education     | 7                       | 2   | 77.8           | 22.2 |                                          |
|                      |                                                          | Secondary education   | 3                       | 1   | 75             | 25   |                                          |
|                      |                                                          | Higher education      | 1                       | 1   | 50             | 50   |                                          |

## Supplementary Materials File S2: Household Survey

### Questionnaire Table

#### Section S1: Demographic details of survey respondents.

|                                  |                                                                                                                                                                                                                                                                                                                                                                                              |
|----------------------------------|----------------------------------------------------------------------------------------------------------------------------------------------------------------------------------------------------------------------------------------------------------------------------------------------------------------------------------------------------------------------------------------------|
| Gender                           | Male <input type="checkbox"/>                                                                                                                                                                                                                                                                                                                                                                |
|                                  | Female <input type="checkbox"/>                                                                                                                                                                                                                                                                                                                                                              |
| Marital status                   | Single <input type="checkbox"/> Divorced <input type="checkbox"/>                                                                                                                                                                                                                                                                                                                            |
|                                  | Married <input type="checkbox"/> Widow/ widower <input type="checkbox"/>                                                                                                                                                                                                                                                                                                                     |
| Age                              | -----                                                                                                                                                                                                                                                                                                                                                                                        |
| Educational level                | Don't read and write <input type="checkbox"/> Primary education <input type="checkbox"/>                                                                                                                                                                                                                                                                                                     |
|                                  | Read and write <input type="checkbox"/> Secondary education <input type="checkbox"/>                                                                                                                                                                                                                                                                                                         |
|                                  | Higher education <input type="checkbox"/>                                                                                                                                                                                                                                                                                                                                                    |
| Religion                         | Orthodox Christian <input type="checkbox"/> Muslim <input type="checkbox"/>                                                                                                                                                                                                                                                                                                                  |
| How many children do you have?   | -----                                                                                                                                                                                                                                                                                                                                                                                        |
| Main source of household income? | Labour on own/ other farm <input type="checkbox"/><br>Casual off-farm labour <input type="checkbox"/><br>Trading/ business <input type="checkbox"/><br>Civil service /official <input type="checkbox"/><br>School teacher <input type="checkbox"/><br>Household/ domestic/ housewife <input type="checkbox"/><br>Remittances <input type="checkbox"/><br>Unemployed <input type="checkbox"/> |

#### Section S2: Household income (Farm and non-farm sources).

In the last 12 months, have you or your household been involved in the following activities listed below? If yes, please enter household annual income in Birr (from November 2015 – October 2016).

| Description |  |  | Quantity | Unit price | Remark |
|-------------|--|--|----------|------------|--------|
|-------------|--|--|----------|------------|--------|

|                         |                                   |        |  |  |  |
|-------------------------|-----------------------------------|--------|--|--|--|
| <b>Farm income</b>      | Milk produced (litters)           |        |  |  |  |
|                         | Eggs produced                     |        |  |  |  |
|                         | Crops produced in (quintal or Kg) | 1..... |  |  |  |
|                         |                                   | 2..... |  |  |  |
|                         |                                   | 3..... |  |  |  |
|                         |                                   | 4..... |  |  |  |
|                         |                                   |        |  |  |  |
|                         | Land rent                         |        |  |  |  |
|                         | Others                            |        |  |  |  |
| <b>Non-farm incomes</b> | Petty trading                     |        |  |  |  |
|                         | Craft activities                  |        |  |  |  |
|                         | Daily labour                      |        |  |  |  |
|                         | Remittance                        |        |  |  |  |
|                         | Food for work                     |        |  |  |  |
|                         | Seasonal migration                |        |  |  |  |
|                         | Others                            |        |  |  |  |

**Section S3. Farm household adaptation to climatic and non-climatic stressors and opportunities.**

**3.1. Farm-related adaptation strategies**

|                                                                              |                                                                                      |                  |                  |           |                  |            |                   |                    |                        |                    |                        |                        |                                           |                               |
|------------------------------------------------------------------------------|--------------------------------------------------------------------------------------|------------------|------------------|-----------|------------------|------------|-------------------|--------------------|------------------------|--------------------|------------------------|------------------------|-------------------------------------------|-------------------------------|
| Have you conducted the following farming practices over the last five years? | If yes, please state your reasons (motivations)<br>(Multiple responses are possible) |                  |                  |           |                  |            |                   |                    |                        |                    |                        |                        |                                           |                               |
|                                                                              | Climate-related reason                                                               | Low market price | Low (high) yield | Poor soil | Pest and disease | Small land | Labour constraint | High market demand | Desire for more income | Government support | Desire for more income | To balance food demand | To avoid reliance on rain-fed agriculture | Other reasons, please specify |
| Changed crop types                                                           |                                                                                      |                  |                  |           |                  |            |                   |                    |                        |                    |                        |                        |                                           |                               |
| Adopted improved seeds                                                       |                                                                                      |                  |                  |           |                  |            |                   |                    |                        |                    |                        |                        |                                           |                               |
| Diversified crops                                                            |                                                                                      |                  |                  |           |                  |            |                   |                    |                        |                    |                        |                        |                                           |                               |
| Adjusted planting dates                                                      |                                                                                      |                  |                  |           |                  |            |                   |                    |                        |                    |                        |                        |                                           |                               |
| Adopted irrigation                                                           |                                                                                      |                  |                  |           |                  |            |                   |                    |                        |                    |                        |                        |                                           |                               |
| Others, please specify                                                       |                                                                                      |                  |                  |           |                  |            |                   |                    |                        |                    |                        |                        |                                           |                               |

**3.2. If possible, please explain in detail one specific reason for conducting one of the farming strategies you have conducted so far.**

### 3.3. Non-farm/off-farm related adaptation strategies

| Have you conducted the following non-farm/off-farm strategies over the last five years? | If you yes, please mention your reasons (motivations)<br>(Multiple responses are possible) |                          |                                                     |                            |                       |
|-----------------------------------------------------------------------------------------|--------------------------------------------------------------------------------------------|--------------------------|-----------------------------------------------------|----------------------------|-----------------------|
|                                                                                         | Climate related                                                                            | Poor agricultural market | Lack of access to agricultural land (land shortage) | Desire to earn more income | Other, please specify |
| Owning-small shops                                                                      |                                                                                            |                          |                                                     |                            |                       |
| selling local food and traditional alcohol drinks                                       |                                                                                            |                          |                                                     |                            |                       |
| Wage employment                                                                         |                                                                                            |                          |                                                     |                            |                       |
| Working on other agricultural farms                                                     |                                                                                            |                          |                                                     |                            |                       |
| collecting and selling firewood                                                         |                                                                                            |                          |                                                     |                            |                       |
| Other, please specify                                                                   |                                                                                            |                          |                                                     |                            |                       |

3.4. If you have conducted one of the non-farm or off-farm strategies above, please explain in detail your rationale for engaging in that activity.

---



---



---



---

### 3.5. Non-farm related adaption strategy (Migration)

| Reasons for conducting migration | If you or your family members have conducted temporary migration) over the last 5 years, please state your reasons motivations |
|----------------------------------|--------------------------------------------------------------------------------------------------------------------------------|
| Land scarcity/landlessness       |                                                                                                                                |
| Unfavourable climate condition   |                                                                                                                                |
| Lack of employment opportunities |                                                                                                                                |
| To repay fertilizer debt         |                                                                                                                                |
| For education reason             |                                                                                                                                |
| Family reason (marriage)         |                                                                                                                                |
| Other, please specify            |                                                                                                                                |

**3.6. If you or your family members have conducted temporary migration over the last five years, please specify one of your reasons in detail.**

-----

-----

-----

-----

-----
